# Supplementary material
Source: PubMed Central journal article supplement (PMC4406811)
Supplement: NIHMS661948-supplement-2.pdf [file NIHMS661948-supplement-2.pdf]

**Supplementary Table 1.** siRNA sequences

| <b>Gene</b> | <b>Primer Sequences</b>         |
|-------------|---------------------------------|
| <i>Gbp2</i> | 5'-UGA AGA AGC UGA CUG AGA A-3' |
|             | 5'-GAA GUG CAC UAU ACU CUG A-3' |
|             | 5'-GGA GCU GUG UGG UGA AUU U-3' |
|             | 5'-GGA GCU AAC UGA UCU UAU C-3' |
| <i>Gbp3</i> | 5'-GAA CGA AGC AGC AUC UAU U-3' |
|             | 5'-GGA CUU UGG UGC AGA CCU A-3' |
|             | 5'-GGC CAU UGU UGG UUU AUA U-3' |
|             | 5'-CAC AAG CGA CAA ACG UUU A-3' |
| <i>Gbp5</i> | 5'-CGC AGG AGU UCU AUC AUA A-3' |
|             | 5'-UGA CUG UGU UAU AAG CUA A-3' |
|             | 5'-ACU CAG AUC UUU GCA CUA G-3' |
|             | 5'-GCG AGA GGC CAU AGA AAU C-3' |
| <i>Gbp7</i> | 5'-AAG AAU AGC UCA UUG GGU G-3' |
|             | 5'-CGA CCU ACG UGG AUG CUA U-3' |
|             | 5'-GGA CUA UAC CGU ACG GGA A-3' |
|             | 5'-GAC GUG CCG UGU UUA GAG A-3' |

**Supplementary Table 2.** Real time qPCR primer sequences

| <b>Gene</b>    | <b>Primer Sequences</b>                                                                        |
|----------------|------------------------------------------------------------------------------------------------|
| <i>Gapdh</i>   | Forward: 5'-CGT CCC GTA GAC AAA ATG GT-3'<br>Reverse: 5'-TTG ATG GCA ACA ATC TCC AC-3'         |
| <i>β-actin</i> | Forward: 5'-GGC TGT ATT CCC CTC CAT CG-3'<br>Reverse: 5'-CCA GTT GGT AAC AAT GCC ATG T-3'      |
| <i>Aim2</i>    | Forward: 5'-GAT TCA AAG TGC AGG TGC GG-3'<br>Reverse: 5'-TCT GAG GCT TAG CTT GAG GAC-3'        |
| <i>Il1β</i>    | Forward: 5'-GAT CCA CAC TCT CCA GCT GCA-3'<br>Reverse: 5'-CAA CCA ACA AGT GAT ATT CTC CAT G-3' |
| <i>Il12p40</i> | Forward: 5'-GGA ATT GTA ATA GCG ATC CTG AGC-3'<br>Reverse: 5'-ACA TCT ACC GAA GTC CAA TGC A-3' |
| <i>Ifnβ</i>    | Forward: 5'-GCC TTT GCC ATC CAA GAG ATG C-3'<br>Reverse: 5'-ACA CTG TCT GCT GGT GGA GTT C-3'   |
| <i>mGbp2</i>   | Forward: 5'-CTG CAC TAT GTG ACG GAG CTA-3'<br>Reverse: 5'-CGG AAT CGT CTA CCC CAC TC-3'        |
| <i>mGbp3</i>   | Forward: 5'-CTG ACA GTA AAT CTG GAA GCC AT-3'<br>Reverse: 5'-CCG TCC TGC AAG ACG ATT CA-3'     |
| <i>mGbp4</i>   | Forward: 5'-GGA GAA GCT AAC GAA GGA ACA A-3'<br>Reverse: 5'-TTC CAC AAG GGA ATC ACC ATT TT-3'  |
| <i>mGbp5</i>   | Forward: 5'-CTG AAC TCA GAT TTT GTG CAG GA-3'<br>Reverse: 5'-CAT CGA CAT AAG TCA GCA CCA G-3'  |
| <i>mGbp7</i>   | Forward: 5'-TCC TGT GTG CCT AGT GGA AAA-3'<br>Reverse: 5'-CAA GCG GTT CAT CAA GTA GGA T-3'     |
| <i>mGbp8</i>   | Forward: 5'-ACA TCT GTC CAT GAA CCA TGA AG-3'<br>Reverse: 5'-AAA CCG TGA TTC TGT CCT GCC-3'    |
| <i>mGbp9</i>   | Forward: 5'-ACC GGG AAT AGA CTG GGT ACT-3'<br>Reverse: 5'-CCG GGC CAC ACT TGT CAT A-3'         |
